# Supplementary material for: Theoretical Studies of Acrolein Hydrogenation to Propenol and Propanal on Au<sub>3</sub> and Au<sub>5</sub>
Source: Preprints.org preprint supplement (doi:10.20944/preprints201612.0109.v1), 2016-12-21
Supplement: Supplementary file 1 [file supplementary]

# Supplementary Materials

## Theoretical Studies of Acrolein Hydrogenation to Propenol and Propanal on Au<sub>3</sub> and Au<sub>5</sub>

Guo-Jun Kang, Shuai He and Xue-Feng Ren

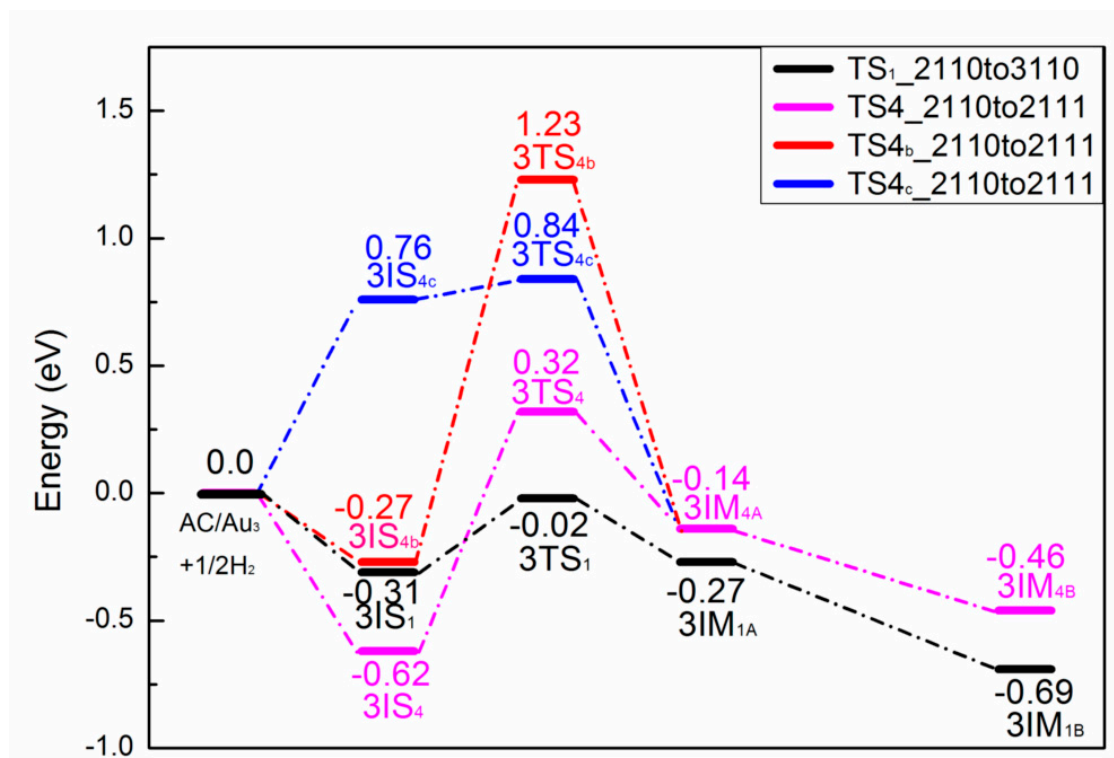

Figure A1 Potential energy surfaces of first hydrogenation step of acrolein on Au<sub>3</sub>.

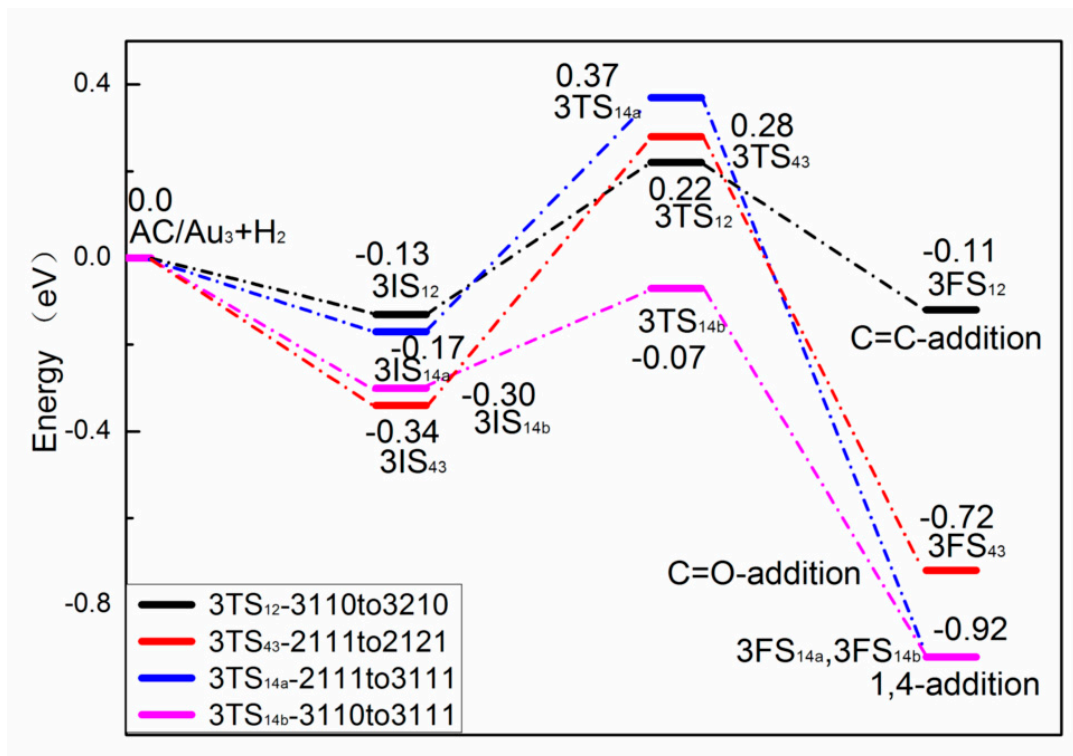

Figure A2 Potential energy surfaces of second hydrogenation step of acrolein on Au<sub>3</sub>.

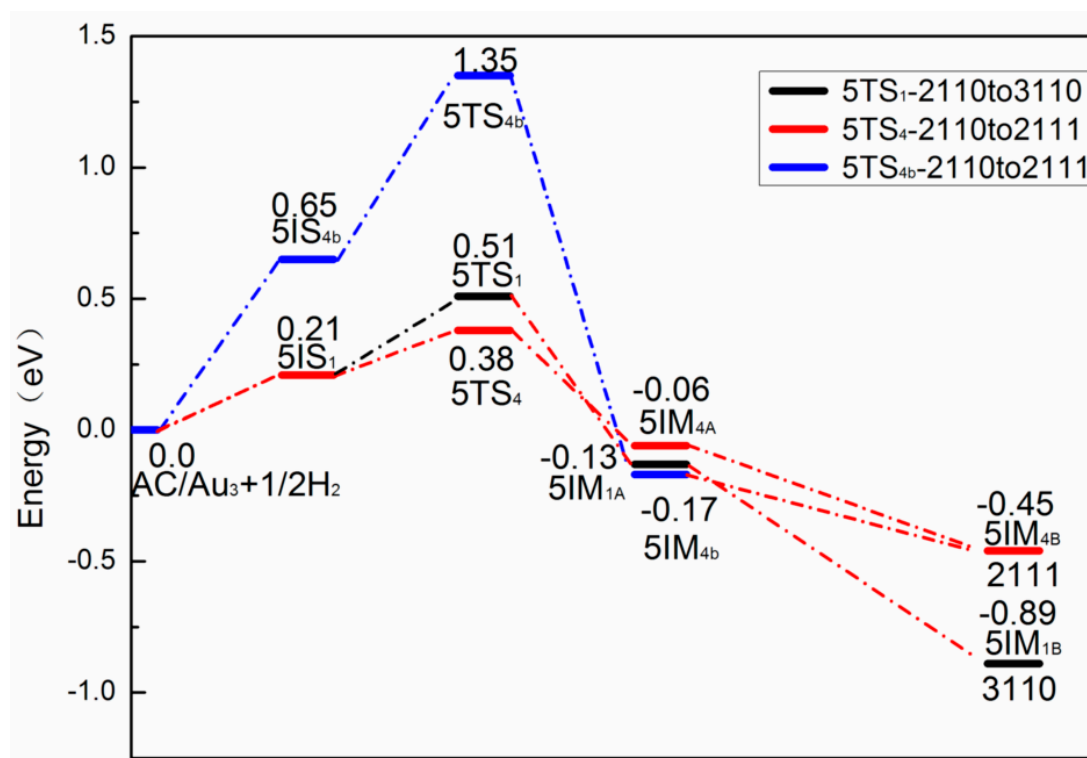

Figure A3 Potential energy surfaces of first hydrogenation step of acrolein on Au<sub>3</sub>.

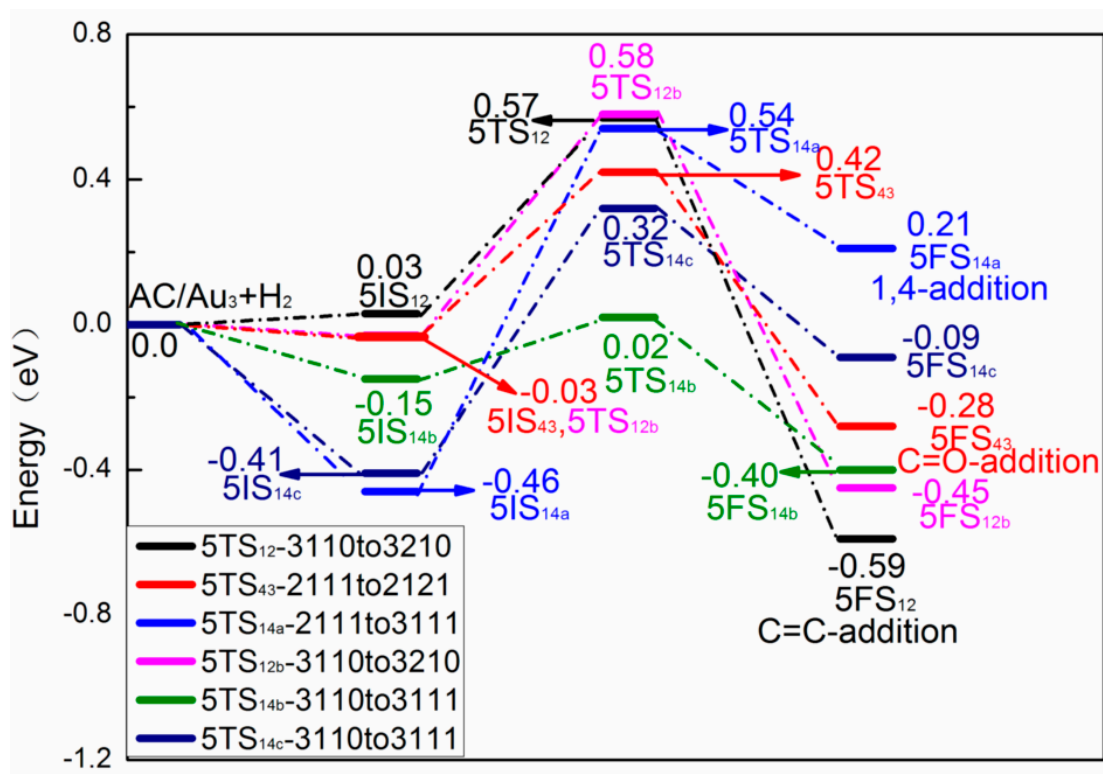

Figure A4 Potential energy surfaces of second hydrogenation step of acrolein on Au<sub>3</sub>.
